# Supplementary material for: Kinase-Dead BRAF and Oncogenic RAS Cooperate to Drive Tumor Progression through CRAF
Source: PubMed Central journal article supplement (PMC2872605; doi:10.1016/j.cell.2009.12.040), 2010-01-22
Supplement: mmc1.pdf [file mmc1.pdf]

| Kinase    | % Remaining Activity | Kinase              | % Remaining Activity |
|-----------|----------------------|---------------------|----------------------|
| MKK1      | 78                   | CHK1                | 86                   |
| ERK1      | 100                  | CHK2                | 71                   |
| ERK2      | 77                   | GSK3b               | 99                   |
| JNK1      | 95                   | CDK2-Cyclin A       | 104                  |
| JNK2      | 80                   | PLK1                | 92                   |
| p38a MAPK | 87                   | PLK1 (Okadaic Acid) | 96                   |
| P38b MAPK | 71                   | AURORA B            | 93                   |
| p38g MAPK | 99                   | AMPK                | 90                   |
| p38s MAPK | 87                   | MARK3               | 104                  |
| ERK8      | 86                   | BRSK2               | 95                   |
| RSK1      | 82                   | MELK                | 83                   |
| RSK2      | 74                   | CK1                 | 39                   |
| PDK1      | 98                   | CK2                 | 96                   |
| PKBa      | 93                   | DYRK1A              | 103                  |
| PKBb      | 88                   | DYRK2               | 102                  |
| SGK1      | 108                  | DYRK3               | 87                   |
| S6K1      | 96                   | NEK2a               | 77                   |
| PKA       | 92                   | NEK6                | 77                   |
| ROCK 2    | 77                   | IKKb                | 80                   |
| PRK2      | 84                   | PIM1                | 81                   |
| PKCa      | 106                  | PIM2                | 89                   |
| PKC zeta  | 85                   | PIM3                | 72                   |
| PKD1      | 85                   | SRPK1               | 107                  |
| MSK1      | 73                   | MST2                | 87                   |
| MNK1      | 77                   | EFK2                | 98                   |
| MNK2      | 96                   | HIPK2               | 73                   |
| MAPKAP-K2 | 104                  | PAK4                | 82                   |
| PRAK      | 86                   | PAK5                | 81                   |
| CAMKKb    | 96                   | PAK6                | 87                   |
| CAMK1     | 87                   | Src                 | 68                   |
| SmMLCK    | 70                   | Lck                 | 58                   |
| PHK       | 77                   | CSK                 | 92                   |

**Table S1. 885-A is inactive against a panel of other kinases in vitro.**

Inhibition profiling of 885-A against a panel of 64 kinases at a fixed concentration of 1 $\mu$ M. Values are the % remaining activity compared to DMSO-treated controls.

| <b>Cell Line</b> | <b>Tumour type</b>      | <b>BRAF</b> | <b>KRAS</b> | <b>NRAS</b> |
|------------------|-------------------------|-------------|-------------|-------------|
| A375             | Melanoma                | V600E       | WT          | WT          |
| D24              | Melanoma                | V600E       | WT          | WT          |
| SkMel24          | Melanoma                | V600E       | WT          | WT          |
| SkMEI28          | Melanoma                | V600E       | WT          | WT          |
| WM266.4          | Melanoma                | V600D       | WT          | WT          |
| D04              | Melanoma                | WT          | WT          | NRAS Q61L   |
| MM415            | Melanoma                | WT          | WT          | NRAS Q61L   |
| MM485            | Melanoma                | WT          | WT          | NRAS Q61R   |
| WM852            | Melanoma                | WT          | WT          | NRAS Q61R   |
| PMWK             | Melanoma                | WT          | WT          | WT          |
| WM1791c          | Melanoma                | WT          | T50I/Q61H   | WT          |
| HCT116           | colorectal<br>carcinoma | WT          | G13D        | WT          |
| SW620            | colorectal<br>carcinoma | WT          | G12V        | WT          |

**Table S2. Cell lines used in this study**

The cell lines used in this study are shown, together with the mutations that they harbor in RAS or BRAF.

| <b>Buffer</b>                  | <b>Composition</b>                                                                                                                                                                                                                                           |
|--------------------------------|--------------------------------------------------------------------------------------------------------------------------------------------------------------------------------------------------------------------------------------------------------------|
| <b>NP40 protein extraction</b> | 50mM Tris-Cl pH 7.5, 150mM NaCl, 0.5% (v/v) Igepal, 5mM NaF, 0.2mM Na <sub>3</sub> VO <sub>4</sub> , 5μg/ml aprotinin, 5μg/ml leupeptin                                                                                                                      |
| <b>CIP</b>                     | 50mM Tris-Cl pH 7.5, 150mM NaCl, 10mM MgCl <sub>2</sub> , 1mM EDTA                                                                                                                                                                                           |
| <b>WASH</b>                    | 30mM Tris-Cl pH 7.5, 0.2mM EDTA, 0.3% (v/v) β-mercaptoethanol, 10% (v/v) glycerol, 0.1% (v/v) Triton X-100, 5mM NaF, 0.2mM Na <sub>3</sub> VO <sub>4</sub> , 1M/0.1M/no KCl                                                                                  |
| <b>MKK</b>                     | 30mM Tris-Cl pH 7.5, 0.1mM EDTA, 10mM MgCl <sub>2</sub> , 0.1% (v/v) Triton X-100, 5mM NaF, 0.2mM Na <sub>3</sub> VO <sub>4</sub> , 0.3% (v/v) β-ME, 6.5μg/ml (~0.093 μM) GST-MEK, 400μg/ml (~6.68 μM) GST-ERK, 5mM ATP                                      |
| <b>KILL</b>                    | 30mM Tris-Cl pH 7.5, 9.0mM EDTA, 0.1% (v/v) Triton X-100, 5mM NaF, 0.2mM Na <sub>3</sub> VO <sub>4</sub> , 0.3% (v/v) β-ME                                                                                                                                   |
| <b>MBP</b>                     | 50mM Tris-Cl pH 7.5, 0.1mM EDTA, 12mM MgCl <sub>2</sub> , 0.1% (v/v) Triton X-100, 5mM NaF, 0.2mM Na <sub>3</sub> VO <sub>4</sub> , 0.3% (v/v) β-ME, 200μg/ml BSA, 1mg/ml MBP, 0.12MBq [ <sup>32</sup> P]-ATP (5.55 x 10 <sup>8</sup> MBq/mmol; PerkinElmer) |
| <b>DELPHIA ASSAY BUFFER</b>    | 20mM MOPS, pH 7.2, containing 5mM EGTA, 10mM MgCl <sub>2</sub> , 0.1% β-ME, 25mM β-glycerophosphate                                                                                                                                                          |

**Table S3. Composition of buffers used in this study**
